# Supplementary material
Source: PubMed Central journal article supplement (PMC2937577)
Supplement: jn.110.124297_1.pdf [file jn.110.124297_1.pdf]

**Supplemental Table 1.** Odd ratios and 95% confidence intervals of metabolic syndrome by quintile of fat intake as a percentage of total energy in 1,207 Puerto Rican adults<sup>1,2,3</sup>

| Type of Fat         |         | Quintile 1<br>(n=241) <sup>4</sup> | Quintile 2<br>(n=242) <sup>4</sup> | Quintile 3<br>(n=241) <sup>4</sup> | Quintile 4<br>(n=242) <sup>4</sup> | Quintile 5<br>(n=241) <sup>4</sup> | P trend |
|---------------------|---------|------------------------------------|------------------------------------|------------------------------------|------------------------------------|------------------------------------|---------|
| Saturated fat       | Model 1 | Reference                          | 0.78 (0.50, 1.2)                   | 1.07 (0.66, 1.7)                   | 1.22 (0.71, 2.1)                   | 1.0 (0.56, 1.8)                    | 0.86    |
|                     | Model 2 | --                                 | 0.82 (0.52, 1.3)                   | 1.21 (0.73, 2.0)                   | 1.28 (0.72, 2.3)                   | 1.1 (0.59, 2.0)                    | 0.85    |
| Monounsaturated fat | Model 1 | --                                 | 1.24 (0.80, 1.9)                   | 1.54 (0.91, 2.6)                   | 1.01 (0.58, 1.7)                   | 1.15 (0.61, 2.2)                   | 0.59    |
|                     | Model 2 | --                                 | 1.25 (0.77, 2.0)                   | 1.50 (0.86, 2.6)                   | 0.91 (0.50, 1.6)                   | 1.04 (0.52, 2.1)                   | 0.90    |
| Polyunsaturated fat | Model 1 | --                                 | 0.65 (0.43, 0.99)                  | 0.69 (0.44, 1.1)                   | 0.94 (0.59, 1.5)                   | 0.83 (0.50, 1.4)                   | 0.74    |
|                     | Model 2 | --                                 | 0.68 (0.43, 1.1)                   | 0.74 (0.46, 1.2)                   | 0.92 (0.56, 1.5)                   | 0.82 (0.47, 1.4)                   | 0.74    |
| (n-3) fatty acids   | Model 1 | --                                 | 1.43 (0.93, 2.2)                   | 1.02 (0.66, 1.6)                   | 0.87 (0.55, 1.4)                   | 0.90 (0.57, 1.4)                   | 0.14    |
|                     | Model 2 | --                                 | 1.27 (0.80, 2.0)                   | 1.02 (0.65, 1.6)                   | 0.72 (0.44, 1.2)                   | 0.80 (0.49, 1.3)                   | 0.04    |
| (n-6) fatty acids   | Model 1 | --                                 | 0.73 (0.48, 1.1)                   | 0.67 (0.43, 1.1)                   | 1.1 (0.68, 1.8)                    | 0.99 (0.59, 1.7)                   | 0.62    |
|                     | Model 2 | --                                 | 0.76 (0.48, 1.2)                   | 0.73 (0.45, 1.2)                   | 1.15 (0.68, 1.9)                   | 1.05 (0.60, 1.8)                   | 0.48    |
| Trans fat           | Model 1 | --                                 | 0.94 (0.62, 1.4)                   | 0.80 (0.52, 1.2)                   | 1.14 (0.72, 1.8)                   | 1.1 (0.72, 1.8)                    | 0.72    |
|                     | Model 2 | --                                 | 0.78 (0.50, 1.2)                   | 0.73 (0.46, 1.2)                   | 0.97 (0.60, 1.6)                   | 1.1 (0.66, 1.8)                    | 0.58    |

<sup>1</sup> Analyses were performed comparing each quintile to the reference group (quintile 1) using logistic regression; a trend test was performed across quintiles.

<sup>2</sup> Model 1 was adjusted for age, sex, smoking and alcohol use, physical activity, education, fish oil supplement use, acculturation, total energy, total fat, dietary fiber and lipid-lowering medication use.

<sup>3</sup> Model 2 was adjusted for all covariates in model 1 and BMI.

<sup>4</sup> Due to missing data for some covariates, sample sizes for each analysis vary around the reported sample size (n).
